# Supplementary material for: Highly proton conductive, dense polybenzimidazole membranes with low permeability to vanadium and enhanced H2SO4absorption capability for use in vanadium redox flow batteries
Source: Royal Society of Chemistry journal article supplement (doi:10.1039/c6ta05080h), 2016-01-01

## Supporting Information

### **Highly proton conductive, dense polybenzimidazole membranes with low permeability to vanadium and enhanced H<sub>2</sub>SO<sub>4</sub> absorption capability for use in vanadium redox flow batteries**

Jung-Kyu Jang,<sup>a</sup> Tae-Ho Kim,<sup>\*a</sup> Sang Jun Yoon,<sup>a</sup> Jang Yong Lee,<sup>a</sup>

Jong-Chan Lee<sup>b</sup> and Young Taik Hong<sup>\*a</sup>

*<sup>a</sup>Center for Membranes, Korea Research Institute of Chemical Technology, 141 Gajeong-ro, Yuseong-gu, Daejeon 305-600, Republic of Korea*

*<sup>b</sup>School of Chemical and Biological Engineering and Institute of Chemical Processes, Seoul National University, 599 Gwanak-ro, Gwanak-gu, Seoul 151-744, Republic of Korea*

\*Corresponding authors' e-mails: [thkim@kriict.re.kr](mailto:thkim@kriict.re.kr) and [ythong@kriict.re.kr](mailto:ythong@kriict.re.kr)

**Fig. S1** UV-Vis absorbance *verse* mol% VO<sup>2+</sup> in mixed VO<sup>2+</sup> and VO<sub>2</sub><sup>+</sup> solution at 760 nm (total vanadium concentration = 0.1 M).

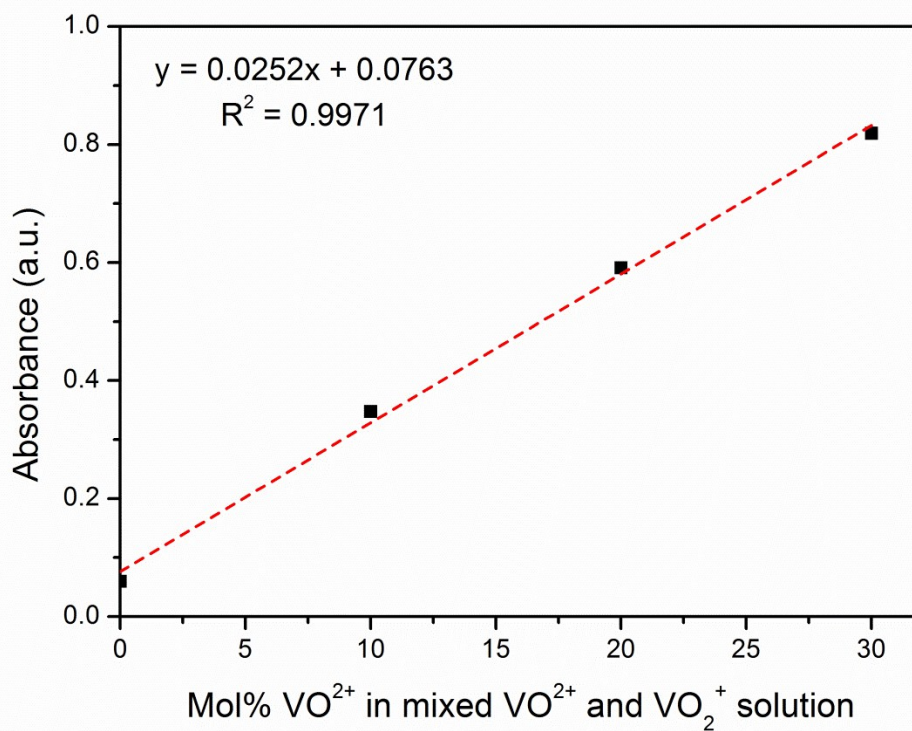

**Fig. S2** Chemical structure of sulfonated poly(arylene ether sulfone) (BPSH-50).

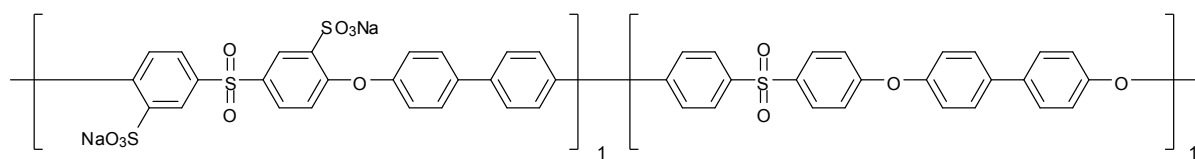

**Fig. S3** (a)  $^1\text{H}$  NMR spectrum of BITA, (b)  $^1\text{H}$  NMR spectrum of BI*p*PBI, and (c) ATR-IR spectra of mPBI and BI*p*PBI

(a)

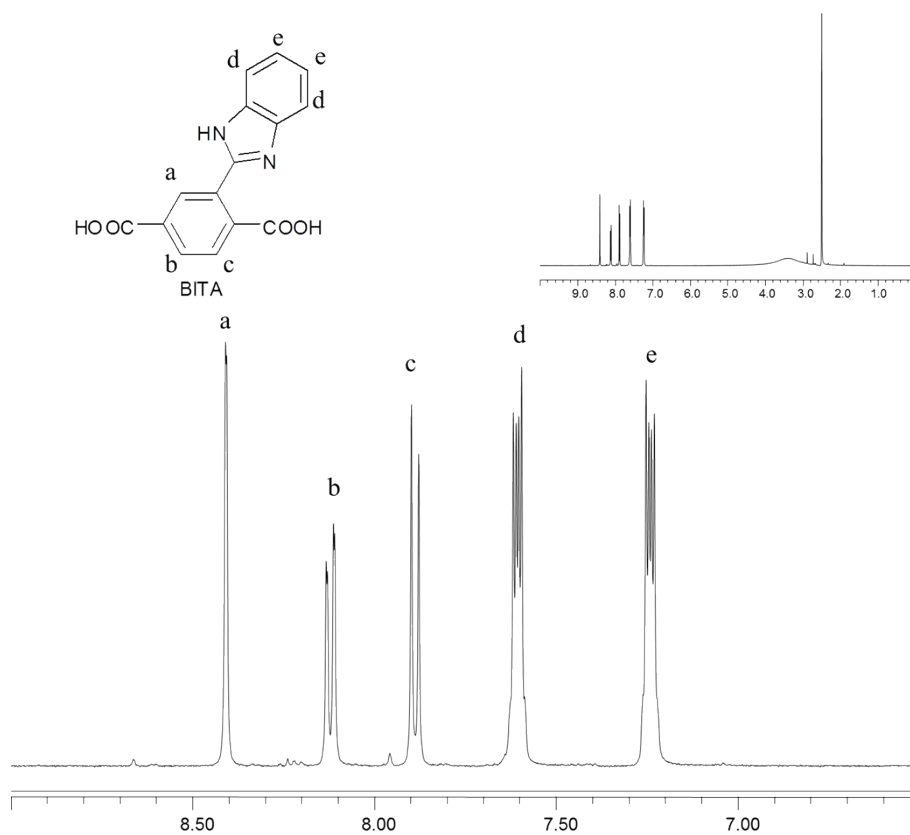

(b)

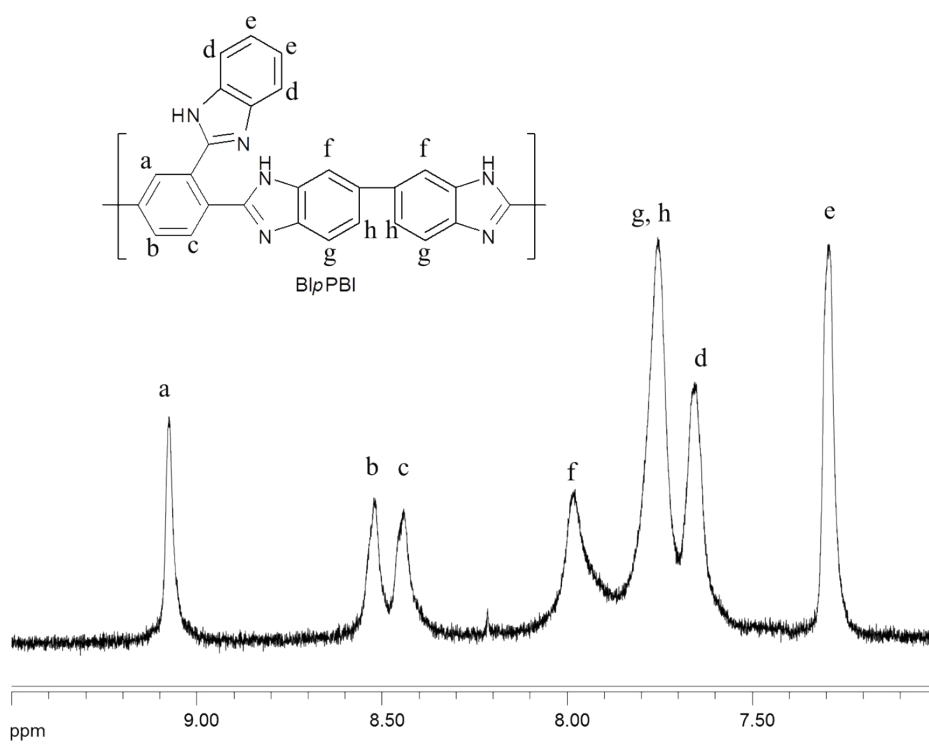

(c)

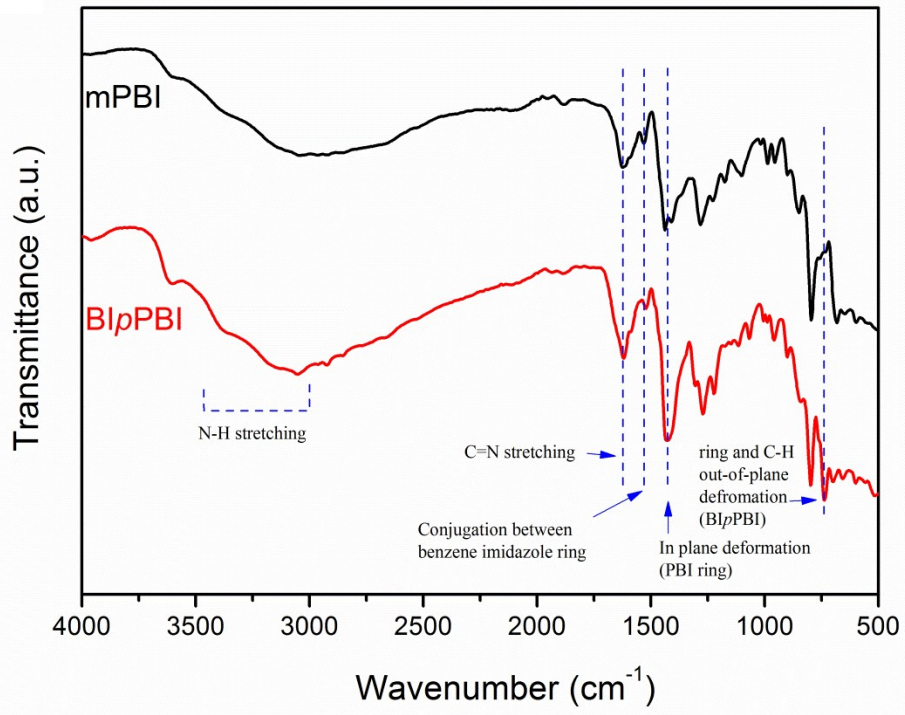

**Fig. S4** The dielectric constant of PBI membranes (a) mPBI (b) BI $\rho$ PBI

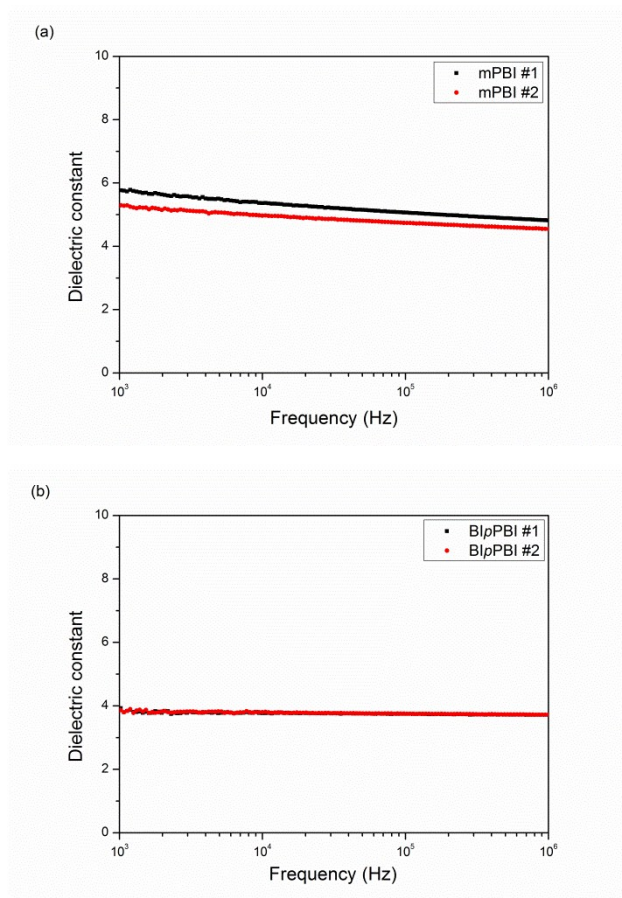

### Summary of the dielectric constant

|               | Sample | 40 Hz | 1 kHz | 1 MHz |
|---------------|--------|-------|-------|-------|
| mPBI          | 1      | 6.04  | 5.70  | 4.82  |
|               | 2      | 5.98  | 5.30  | 4.55  |
| BI $\rho$ PBI | 1      | 3.70  | 3.93  | 3.71  |
|               | 2      | 3.95  | 3.87  | 3.72  |

**Fig. S5** Charge-discharge curves of VRFBs at various current densities with prepared membrane (a) Nafion 115 (b) mPBI (c) BI<sub>p</sub>PBI

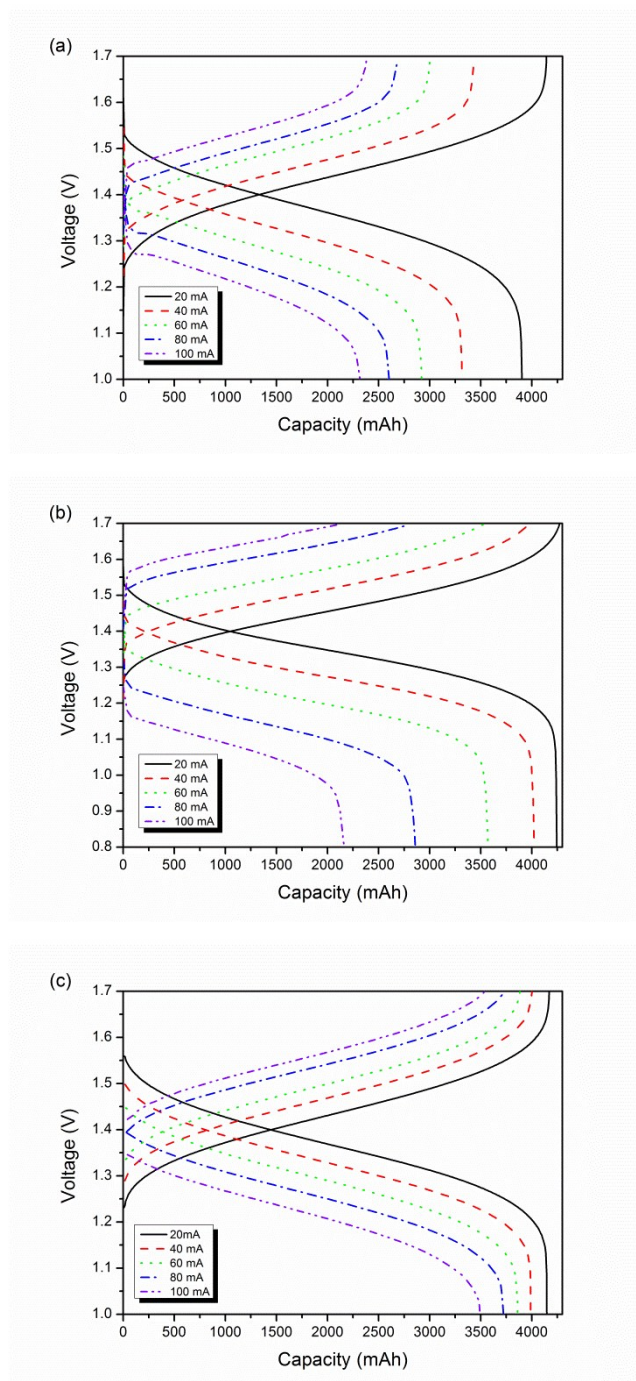

**Fig. S6** Cycling test result of VRFB single cells with BIpPBI membrane at  $120\text{mA cm}^{-2}$  for 500 cycle.

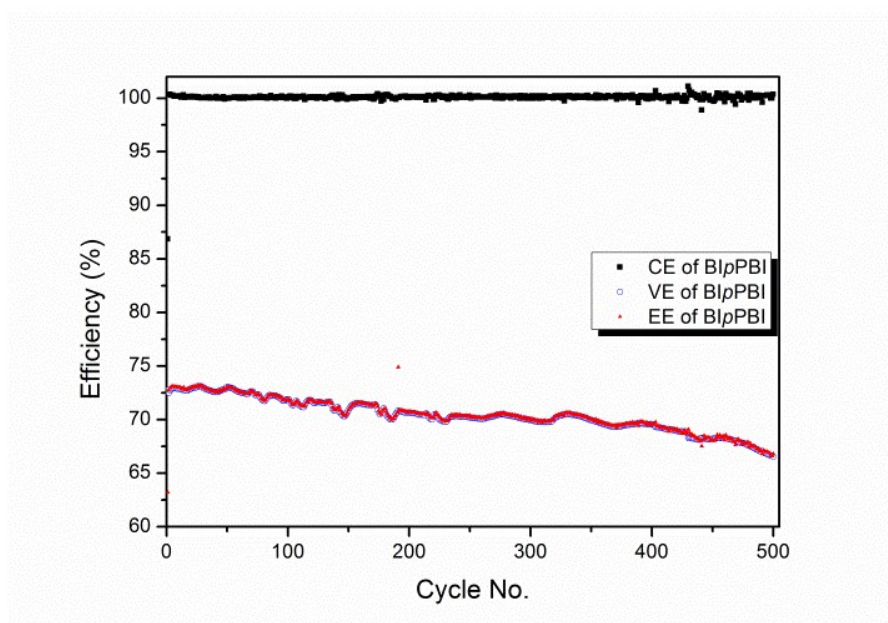



**Fig. S7** Electrolyte volume change after the 200 cycling tests for VRFB cells assembled with (a) mPBI and (b) BIpPBI membranes.

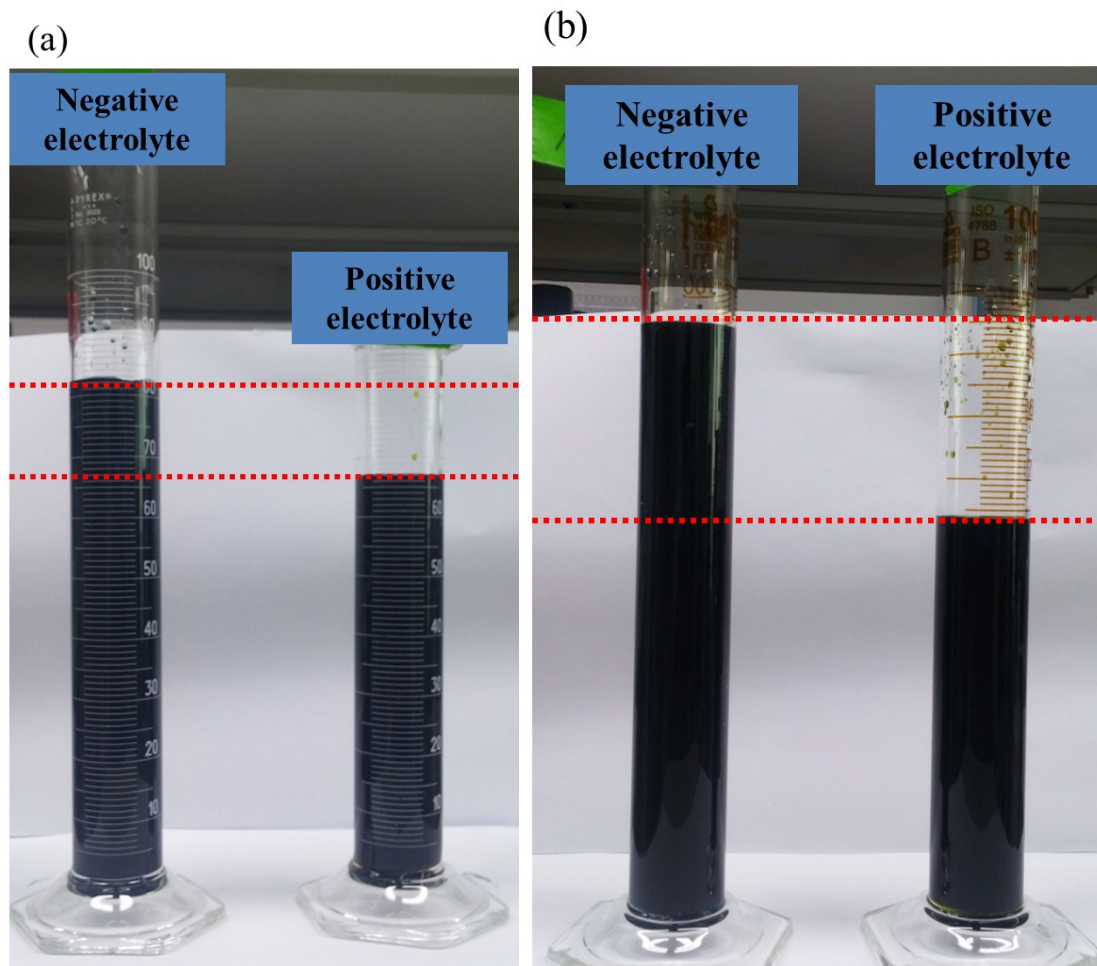

**Fig. S8** Color change of the ex situ test solutions (0.1M  $\text{VO}_2^+$ /5M  $\text{H}_2\text{SO}_4$ ) containing Nafion 115, BPSH-50, mPBI, and BI*p*PBI membranes over measuring time.

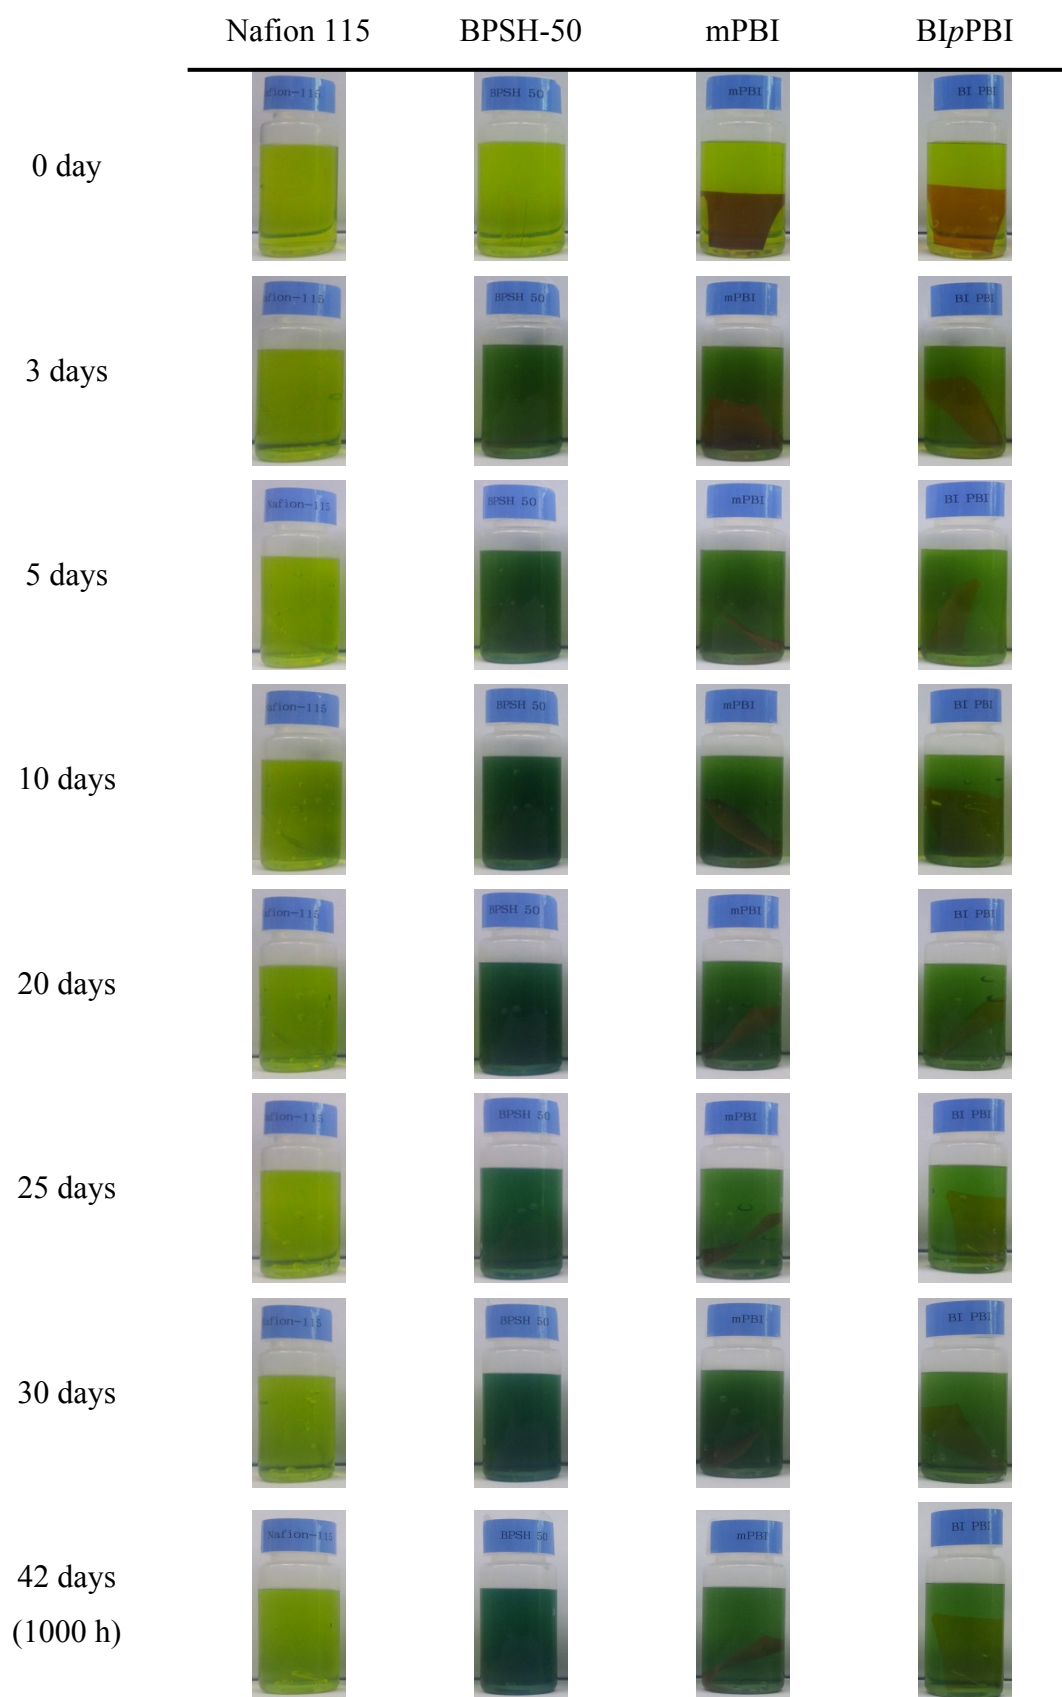

**Fig. S9** SEM image of BIPBI membranes : pristine (a : surface, a' : cross section), after 1000 h soaking test (b : surface, b' : cross section), and after 200 cycling test (c : surface, c' : cross section).

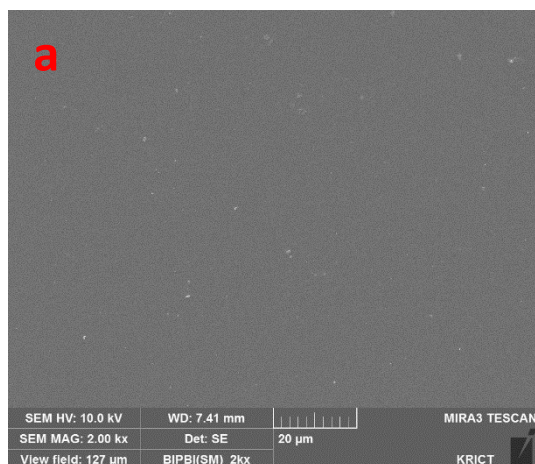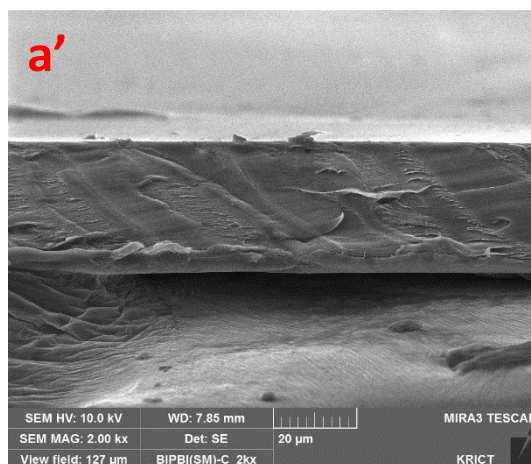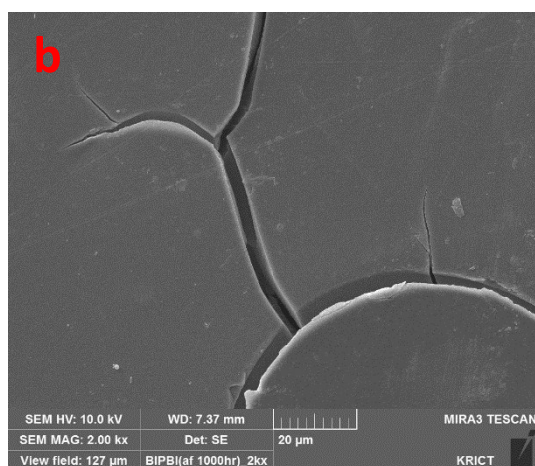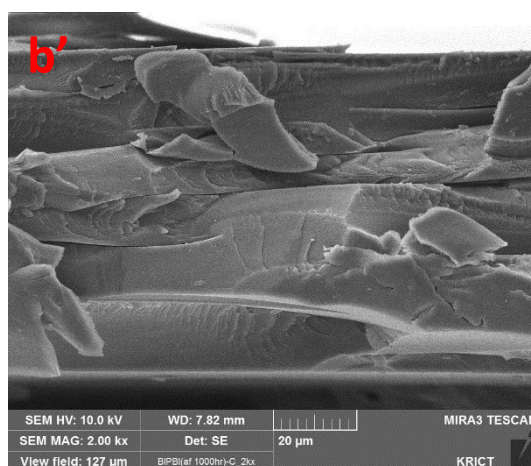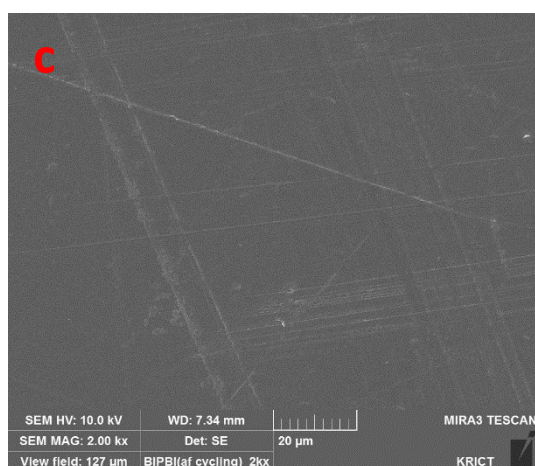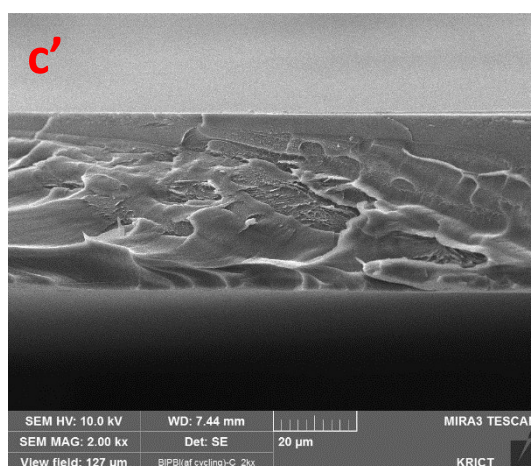

Supplement: c6ta05080h1.pdf [file c6ta05080h1.pdf]
